# Supplementary material for: Physiological and biochemical responses of hybrid maize (Zea mays L.) varieties grown under heat stress conditions
Source: PeerJ. 2022 Sep 21;10:e14141. doi: 10.7717/peerj.14141 (PMC9508888; doi:10.7717/peerj.14141)
Supplement: Supplemental Information 1 — Years and combined years were subjected to variance analysis at 6 parameters investigated in the study, furthermore, statistical groups were formed according to the LSD test. Correlation test was performed between all traits determined in the study. [file peerj-10-14141-s001.xlsx]

## Sheet: 2020
Replication(R )	growing period (GP)	Varieties (V)	Total phenol content (TPC, μg g)	Chlorophyll-a (Chl-a, mg g)	Days to 50% tassel (DT, day)	Cell membrane damage (CMD, %)	Leaf water potential (LWP, %)	Grain yield (GY, kg ha-1)
1	2022-05-01	ADA 17.1	225.44	7.04	47	9.87	78.16	8321.2	model
1	2022-05-01	ADA 17.2	232.13	7.66	46	10.99	80.23	10034	R
1	2022-05-01	ADA 17.3	245.54	6.56	43	11.09	78.87	10712	GP
1	2022-05-01	ADA 17.4	262.13	9.66	50	8.77	83.44	11234.5	R*GP	(er)
1	2022-05-01	ADA 17.5	254.33	6.54	52	12.33	80	11000	V
1	2022-05-01	ADA 17.6	221.34	6.77	51	12.65	80.21	12134	GP*V
1	2022-05-01	ADA 17.7	230.54	6.12	48	14.33	77.65	9444
1	2022-05-01	ADA 17.8	221.45	6	51	14.33	74.55	7689
1	2022-05-01	SYM-305	215.44	4.32	48	19.88	73.44	7132.3
1	2022-05-01	SYM-306	210.99	2.34	47	17.66	74.55	5253
1	2022-05-01	SYM-307	251.47	9.87	53	10.76	85.66	12244
1	2022-05-01	P.31G98	245.66	8.77	51	11.45	83.22	9342.3
1	2022-05-01	DKC6590	240.45	8.77	51	12.23	85.34	11784.5
2	2022-05-01	ADA 17.1	235.44	6.67	48	8.77	77.56	9543
2	2022-05-01	ADA 17.2	236.55	8.71	47	11.78	78.32	11234
2	2022-05-01	ADA 17.3	241.67	7.51	44	10.54	79.12	9435
2	2022-05-01	ADA 17.4	257.81	10.88	51	9.65	81.22	12340
2	2022-05-01	ADA 17.5	261.34	7.12	53	13.45	81.13	9564
2	2022-05-01	ADA 17.6	226.77	5.42	49	13.44	81.45	9435
2	2022-05-01	ADA 17.7	236.55	7.21	49	13.07	79.12	8552
2	2022-05-01	ADA 17.8	226.55	7.11	53	15.21	76.12	8765
2	2022-05-01	SYM-305	221.33	5.12	49	17.66	72.45	4987
2	2022-05-01	SYM-306	216.77	4.32	49	15.66	76.23	6132.1
2	2022-05-01	SYM-307	256.77	10.12	54	11.34	83.44	11236
2	2022-05-01	P.31G98	255.68	8	50	13.22	85.23	11234
2	2022-05-01	DKC6590	251.33	9.78	52	13.32	86.77	13215
3	2022-05-01	ADA 17.1	241.89	7.56	50	7.67	75.31	10230
3	2022-05-01	ADA 17.2	241.22	8	49	9.21	77.66	9234
3	2022-05-01	ADA 17.3	235.44	5.44	46	9.34	81.22	9067
3	2022-05-01	ADA 17.4	265.44	11.22	49	6.34	80.99	10876
3	2022-05-01	ADA 17.5	251.34	5.44	51	15.09	82.54	10543
3	2022-05-01	ADA 17.6	231.46	4.78	51	11.34	79.45	10435
3	2022-05-01	ADA 17.7	225.08	5.09	47	12.36	80.13	8132
3	2022-05-01	ADA 17.8	231.56	5.32	50	16	73.87	9132
3	2022-05-01	SYM-305	211.45	4.99	51	20.56	75.21	5789
3	2022-05-01	SYM-306	223.44	3.12	48	13.22	77.09	4443.2
3	2022-05-01	SYM-307	262.22	8.77	52	9.06	84.33	13215
3	2022-05-01	P.31G98	241.35	6.74	49	9.56	84	10565
3	2022-05-01	DKC6590	245.78	9.07	53	14.34	88.12	10567
1	1 agust	ADA 17.1	235.44	7.65	54	7.08	83.44	9389.1
1	1 agust	ADA 17.2	245.66	13.21	56	8.76	85.07	11243.2
1	1 agust	ADA 17.3	257.88	6.55	54	6.55	84.55	11761.9
1	1 agust	ADA 17.4	275.43	10.11	52	5.14	86	13324
1	1 agust	ADA 17.5	265.44	8.06	54	10.06	84.67	12080.4
1	1 agust	ADA 17.6	235.44	9.12	57	8.34	84.33	12324.8
1	1 agust	ADA 17.7	236.77	11.23	51	7.66	84.67	10115
1	1 agust	ADA 17.8	232.44	10.13	56	12.34	81.22	9044.6
1	1 agust	SYM-305	225.44	7.13	53	11.54	80.21	8554
1	1 agust	SYM-306	231.34	6.55	51	14.32	81.22	8006
1	1 agust	SYM-307	264.34	11.23	57	5.09	86.77	13046
1	1 agust	P.31G98	261.22	8.77	57	7.23	87.66	11582.6
1	1 agust	DKC6590	260.98	8.77	56	4.23	88.43	12134
2	1 agust	ADA 17.1	238.77	8.12	56	6	85.44	11423.4
2	1 agust	ADA 17.2	251.42	12.12	55	9.21	84.33	12344.5
2	1 agust	ADA 17.3	265.44	7.23	53	7.78	85.45	12134.5
2	1 agust	ADA 17.4	278.99	12.32	53	6.23	89.12	14445
2	1 agust	ADA 17.5	270.99	7.67	55	13.22	88.06	11234.5
2	1 agust	ADA 17.6	245.78	8.32	56	9.88	81.22	10545
2	1 agust	ADA 17.7	242.33	10.45	53	8.77	86.12	9132
2	1 agust	ADA 17.8	236.55	8.67	57	13.23	83.44	8764
2	1 agust	SYM-305	220.98	8.23	54	9.88	79.23	7823
2	1 agust	SYM-306	235.67	7.13	52	15.43	79.22	7632.3
2	1 agust	SYM-307	272.33	9.54	58	6.34	89	14153.4
2	1 agust	P.31G98	256.74	7.66	56	8.34	85.55	12566
2	1 agust	DKC6590	267.81	9.88	54	3.67	87.12	13452.3
3	1 agust	ADA 17.1	246.55	9.07	57	8.23	81.45	12134.5
3	1 agust	ADA 17.2	260.06	11.45	57	7.42	86.77	10567
3	1 agust	ADA 17.3	252.33	6.34	55	4.56	86.12	10785
3	1 agust	ADA 17.4	267.65	13.44	54	7.25	91.22	15433
3	1 agust	ADA 17.5	276.54	9.43	56	8.77	85.01	13125.6
3	1 agust	ADA 17.6	240.9	9.04	58	10.07	86.55	11234
3	1 agust	ADA 17.7	240.09	9	52	9.06	84.09	11000
3	1 agust	ADA 17.8	231.22	9.12	58	15.13	82.45	10235
3	1 agust	SYM-305	231.23	8.77	52	10.34	77.66	9132
3	1 agust	SYM-306	227.66	8.07	53	12.43	78.08	6132.3
3	1 agust	SYM-307	261.44	8.99	59	4.21	88.21	13709.1
3	1 agust	P.31G98	251.67	8	55	6.08	89	13244
3	1 agust	DKC6590	257.23	10.66	57	5.78	92.13	14023

## Sheet: 2021
R	GP	V	TPC	Chl-a	DT	CMD	LWP	GY
1	2022-05-01	ADA 17.1	225.34	6.12	45	10.43	76.55	8555	model
1	2022-05-01	ADA 17.2	221.33	7.85	49	12.33	75.66	9213	R
1	2022-05-01	ADA 17.3	223.09	4.23	44	12.12	77.88	9000	GP
1	2022-05-01	ADA 17.4	251.67	10.74	48	9.23	80.23	10512	R*GP	(er)
1	2022-05-01	ADA 17.5	240.12	5.67	50	14.67	79.23	9243	V
1	2022-05-01	ADA 17.6	215.55	6.55	49	14.33	78.11	9221.2	GP*V
1	2022-05-01	ADA 17.7	217.66	5.5	46	16.77	75.32	8024
1	2022-05-01	ADA 17.8	205.56	4.55	49	17.66	74.55	8012
1	2022-05-01	SYM-305	205.67	2.34	45	21.34	72.33	5123
1	2022-05-01	SYM-306	191.22	1.22	46	17.66	74	4323
1	2022-05-01	SYM-307	241.22	7.88	52	10.34	82.33	11434
1	2022-05-01	P.31G98	237.77	6.55	49	10.98	78.12	9812
1	2022-05-01	DKC6590	241.33	6.77	50	15.08	82.45	11003
2	2022-05-01	ADA 17.1	222.13	7.23	47	11.34	74.33	9030
2	2022-05-01	ADA 17.2	231.22	5.47	47	13.22	73.44	9776
2	2022-05-01	ADA 17.3	217.88	5.43	45	11.23	75.45	8123
2	2022-05-01	ADA 17.4	257.88	8.77	49	10.09	78.21	9453
2	2022-05-01	ADA 17.5	245.66	6.74	51	15.66	77.65	9789
2	2022-05-01	ADA 17.6	210.34	5.44	51	13.22	79.21	8664
2	2022-05-01	ADA 17.7	227.43	5.9	48	15.34	78.32	8556
2	2022-05-01	ADA 17.8	211.77	5.07	51	19.88	72.13	7345
2	2022-05-01	SYM-305	213.45	3.45	48	22.45	71.24	5714
2	2022-05-01	SYM-306	202.45	2.33	48	18.32	76.55	3612
2	2022-05-01	SYM-307	246.55	6.77	51	11.21	79.23	10543
2	2022-05-01	P.31G98	223.45	7.66	48	12.34	79.43	9045
2	2022-05-01	DKC6590	234.55	8	48	14.09	79.43	12130
3	2022-05-01	ADA 17.1	231.76	4.67	48	13.22	77.09	9554
3	2022-05-01	ADA 17.2	236.55	6.87	45	14.09	77.68	10320
3	2022-05-01	ADA 17.3	220.99	5.07	43	10.98	79.02	7654
3	2022-05-01	ADA 17.4	265.65	6.45	51	8.12	82.45	11233
3	2022-05-01	ADA 17.5	251.33	4.99	52	17.45	81.12	10456
3	2022-05-01	ADA 17.6	217.66	3.99	52	15.44	81.22	7231
3	2022-05-01	ADA 17.7	209.88	6.23	49	17.34	74.21	7432
3	2022-05-01	ADA 17.8	216.52	6.23	50	20.09	73.34	8454
3	2022-05-01	SYM-305	210.91	5.44	49	24.21	73.44	6004
3	2022-05-01	SYM-306	196.13	3.45	45	16.21	75.21	4912
3	2022-05-01	SYM-307	254.45	8.09	54	12.03	81.12	12932
3	2022-05-01	P.31G98	229.88	7.67	51	14.33	80.34	10400
3	2022-05-01	DKC6590	231.22	7.66	52	13.44	81	9432
1	1agust	ADA 17.1	224.57	6.21	48	8.12	78.12	9254
1	1agust	ADA 17.2	235.68	11.23	51	9.12	80.23	9543
1	1agust	ADA 17.3	251.22	5.45	49	7.65	80.32	11000
1	1agust	ADA 17.4	268.45	11.12	51	7.54	86.34	13123.2
1	1agust	ADA 17.5	252.33	7.66	52	11.22	82.33	10905
1	1agust	ADA 17.6	225.56	7.88	54	11.22	81.21	10545
1	1agust	ADA 17.7	235.45	7.55	52	10.08	84.32	9113
1	1agust	ADA 17.8	224.33	8.77	51	14.33	76.12	8024
1	1agust	SYM-305	215.56	5.09	47	16.34	77.66	7231.2
1	1agust	SYM-306	221.34	5.77	48	14.34	77.34	5254
1	1agust	SYM-307	258.99	8.56	53	6.77	85.23	12615
1	1agust	P.31G98	255.56	7.83	52	10.98	85.66	11212
1	1agust	DKC6590	251	7.67	54	7.76	87.66	12113
2	1agust	ADA 17.1	241.34	7.45	49	7.45	79.23	10450
2	1agust	ADA 17.2	241.22	10.12	52	10.56	81.34	12113
2	1agust	ADA 17.3	243.78	6.57	51	8.78	81.22	12134
2	1agust	ADA 17.4	275.54	10.39	53	6.32	84.21	12132
2	1agust	ADA 17.5	261.34	8.44	53	12.45	83.44	12115
2	1agust	ADA 17.6	231.89	8.22	52	10.45	83.44	11235
2	1agust	ADA 17.7	231.34	8.13	49	11.22	83.22	8234
2	1agust	ADA 17.8	228.76	9.87	53	15.45	78.43	8776
2	1agust	SYM-305	220.99	6.07	48	15	74.33	6321
2	1agust	SYM-306	225.66	4.34	50	16.23	75.34	7342
2	1agust	SYM-307	267.71	9.43	54	7.23	86.32	13215
2	1agust	P.31G98	257.66	8.77	51	9.87	87.32	12234
2	1agust	DKC6590	245.89	8.77	53	8.78	89	11233
3	1agust	ADA 17.1	246.78	8.77	50	9.12	81.22	11235
3	1agust	ADA 17.2	247.66	9.21	53	8.77	82.34	10912
3	1agust	ADA 17.3	255.66	5	50	9.34	79.32	10706
3	1agust	ADA 17.4	253.24	13.08	51	8.11	87.34	14232
3	1agust	ADA 17.5	271.34	9.13	55	13	85.12	10046
3	1agust	ADA 17.6	236.98	6.77	55	12.76	84.03	10234
3	1agust	ADA 17.7	240.32	9	51	9.34	85.23	7906
3	1agust	ADA 17.8	234.56	8.08	54	13.22	75.03	9234
3	1agust	SYM-305	225.67	7.65	51	14.21	79.32	9000
3	1agust	SYM-306	231.89	5.17	47	13.46	76	6453
3	1agust	SYM-307	254.33	10.05	56	8.34	87.34	12964
3	1agust	P.31G98	261.89	8.99	49	8.32	88.15	10565
3	1agust	DKC6590	256.78	6.99	51	10.91	88.13	13000

## Sheet: Combined years
Y	R	GP	V	TPC	Chl-a	DT	CMD	LWP	GY
2020	1	2022-05-01	ADA 17.1	225.44	7.04	47	9.87	78.16	8321.2	model
2020	1	2022-05-01	ADA 17.2	232.13	7.66	46	10.99	80.23	10034	Y
2020	1	2022-05-01	ADA 17.3	245.54	6.56	43	11.09	78.87	10712	R*Y		(Y)
2020	1	2022-05-01	ADA 17.4	262.13	9.66	50	8.77	83.44	11234.5	GP
2020	1	2022-05-01	ADA 17.5	254.33	6.54	52	12.33	80	11000	Y*GP
2020	1	2022-05-01	ADA 17.6	221.34	6.77	51	12.65	80.21	12134	R*GP*Y	(er)	(Y)
2020	1	2022-05-01	ADA 17.7	230.54	6.12	48	14.33	77.65	9444	V
2020	1	2022-05-01	ADA 17.8	221.45	6	51	14.33	74.55	7689	Y*V
2020	1	2022-05-01	SYM-305	215.44	4.32	48	19.88	73.44	7132.3	GP*V
2020	1	2022-05-01	SYM-306	210.99	2.34	47	17.66	74.55	5253	Y*GP*V
2020	1	2022-05-01	SYM-307	251.47	9.87	53	10.76	85.66	12244
2020	1	2022-05-01	P.31G98	245.66	8.77	51	11.45	83.22	9342.3
2020	1	2022-05-01	DKC6590	240.45	8.77	51	12.23	85.34	11784.5
2020	2	2022-05-01	ADA 17.1	235.44	6.67	48	8.77	77.56	9543
2020	2	2022-05-01	ADA 17.2	236.55	8.71	47	11.78	78.32	11234
2020	2	2022-05-01	ADA 17.3	241.67	7.51	44	10.54	79.12	9435
2020	2	2022-05-01	ADA 17.4	257.81	10.88	51	9.65	81.22	12340
2020	2	2022-05-01	ADA 17.5	261.34	7.12	53	13.45	81.13	9564
2020	2	2022-05-01	ADA 17.6	226.77	5.42	49	13.44	81.45	9435
2020	2	2022-05-01	ADA 17.7	236.55	7.21	49	13.07	79.12	8552
2020	2	2022-05-01	ADA 17.8	226.55	7.11	53	15.21	76.12	8765
2020	2	2022-05-01	SYM-305	221.33	5.12	49	17.66	72.45	4987
2020	2	2022-05-01	SYM-306	216.77	4.32	49	15.66	76.23	6132.1
2020	2	2022-05-01	SYM-307	256.77	10.12	54	11.34	83.44	11236
2020	2	2022-05-01	P.31G98	255.68	8	50	13.22	85.23	11234
2020	2	2022-05-01	DKC6590	251.33	9.78	52	13.32	86.77	13215
2020	3	2022-05-01	ADA 17.1	241.89	7.56	50	7.67	75.31	10230
2020	3	2022-05-01	ADA 17.2	241.22	8	49	9.21	77.66	9234
2020	3	2022-05-01	ADA 17.3	235.44	5.44	46	9.34	81.22	9067
2020	3	2022-05-01	ADA 17.4	265.44	11.22	49	6.34	80.99	10876
2020	3	2022-05-01	ADA 17.5	251.34	5.44	51	15.09	82.54	10543
2020	3	2022-05-01	ADA 17.6	231.46	4.78	51	11.34	79.45	10435
2020	3	2022-05-01	ADA 17.7	225.08	5.09	47	12.36	80.13	8132
2020	3	2022-05-01	ADA 17.8	231.56	5.32	50	16	73.87	9132
2020	3	2022-05-01	SYM-305	211.45	4.99	51	20.56	75.21	5789
2020	3	2022-05-01	SYM-306	223.44	3.12	48	13.22	77.09	4443.2
2020	3	2022-05-01	SYM-307	262.22	8.77	52	9.06	84.33	13215
2020	3	2022-05-01	P.31G98	241.35	6.74	49	9.56	84	10565
2020	3	2022-05-01	DKC6590	245.78	9.07	53	14.34	88.12	10567
2020	1	1 agust	ADA 17.1	235.44	7.65	54	7.08	83.44	9389.1
2020	1	1 agust	ADA 17.2	245.66	13.21	56	8.76	85.07	11243.2
2020	1	1 agust	ADA 17.3	257.88	6.55	54	6.55	84.55	11761.9
2020	1	1 agust	ADA 17.4	275.43	10.11	52	5.14	86	13324
2020	1	1 agust	ADA 17.5	265.44	8.06	54	10.06	84.67	12080.4
2020	1	1 agust	ADA 17.6	235.44	9.12	57	8.34	84.33	12324.8
2020	1	1 agust	ADA 17.7	236.77	11.23	51	7.66	84.67	10115
2020	1	1 agust	ADA 17.8	232.44	10.13	56	12.34	81.22	9044.6
2020	1	1 agust	SYM-305	225.44	7.13	53	11.54	80.21	8554
2020	1	1 agust	SYM-306	231.34	6.55	51	14.32	81.22	8006
2020	1	1 agust	SYM-307	264.34	11.23	57	5.09	86.77	13046
2020	1	1 agust	P.31G98	261.22	8.77	57	7.23	87.66	11582.6
2020	1	1 agust	DKC6590	260.98	8.77	56	4.23	88.43	12134
2020	2	1 agust	ADA 17.1	238.77	8.12	56	6	85.44	11423.4
2020	2	1 agust	ADA 17.2	251.42	12.12	55	9.21	84.33	12344.5
2020	2	1 agust	ADA 17.3	265.44	7.23	53	7.78	85.45	12134.5
2020	2	1 agust	ADA 17.4	278.99	12.32	53	6.23	89.12	14445
2020	2	1 agust	ADA 17.5	270.99	7.67	55	13.22	88.06	11234.5
2020	2	1 agust	ADA 17.6	245.78	8.32	56	9.88	81.22	10545
2020	2	1 agust	ADA 17.7	242.33	10.45	53	8.77	86.12	9132
2020	2	1 agust	ADA 17.8	236.55	8.67	57	13.23	83.44	8764
2020	2	1 agust	SYM-305	220.98	8.23	54	9.88	79.23	7823
2020	2	1 agust	SYM-306	235.67	7.13	52	15.43	79.22	7632.3
2020	2	1 agust	SYM-307	272.33	9.54	58	6.34	89	14153.4
2020	2	1 agust	P.31G98	256.74	7.66	56	8.34	85.55	12566
2020	2	1 agust	DKC6590	267.81	9.88	54	3.67	87.12	13452.3
2020	3	1 agust	ADA 17.1	246.55	9.07	57	8.23	81.45	12134.5
2020	3	1 agust	ADA 17.2	260.06	11.45	57	7.42	86.77	10567
2020	3	1 agust	ADA 17.3	252.33	6.34	55	4.56	86.12	10785
2020	3	1 agust	ADA 17.4	267.65	13.44	54	7.25	91.22	15433
2020	3	1 agust	ADA 17.5	276.54	9.43	56	8.77	85.01	13125.6
2020	3	1 agust	ADA 17.6	240.9	9.04	58	10.07	86.55	11234
2020	3	1 agust	ADA 17.7	240.09	9	52	9.06	84.09	11000
2020	3	1 agust	ADA 17.8	231.22	9.12	58	15.13	82.45	10235
2020	3	1 agust	SYM-305	231.23	8.77	52	10.34	77.66	9132
2020	3	1 agust	SYM-306	227.66	8.07	53	12.43	78.08	6132.3
2020	3	1 agust	SYM-307	261.44	8.99	59	4.21	88.21	13709.1
2020	3	1 agust	P.31G98	251.67	8	55	6.08	89	13244
2020	3	1 agust	DKC6590	257.23	10.66	57	5.78	92.13	14023
2021	1	2022-05-01	ADA 17.1	225.34	6.12	45	10.43	76.55	8555
2021	1	2022-05-01	ADA 17.2	221.33	7.85	49	12.33	75.66	9213
2021	1	2022-05-01	ADA 17.3	223.09	4.23	44	12.12	77.88	9000
2021	1	2022-05-01	ADA 17.4	251.67	10.74	48	9.23	80.23	10512
2021	1	2022-05-01	ADA 17.5	240.12	5.67	50	14.67	79.23	9243
2021	1	2022-05-01	ADA 17.6	215.55	6.55	49	14.33	78.11	9221.2
2021	1	2022-05-01	ADA 17.7	217.66	5.5	46	16.77	75.32	8024
2021	1	2022-05-01	ADA 17.8	205.56	4.55	49	17.66	74.55	8012
2021	1	2022-05-01	SYM-305	205.67	2.34	45	21.34	72.33	5123
2021	1	2022-05-01	SYM-306	191.22	1.22	46	17.66	74	4323
2021	1	2022-05-01	SYM-307	241.22	7.88	52	10.34	82.33	11434
2021	1	2022-05-01	P.31G98	237.77	6.55	49	10.98	78.12	9812
2021	1	2022-05-01	DKC6590	241.33	6.77	50	15.08	82.45	11003
2021	2	2022-05-01	ADA 17.1	222.13	7.23	47	11.34	74.33	9030
2021	2	2022-05-01	ADA 17.2	231.22	5.47	47	13.22	73.44	9776
2021	2	2022-05-01	ADA 17.3	217.88	5.43	45	11.23	75.45	8123
2021	2	2022-05-01	ADA 17.4	257.88	8.77	49	10.09	78.21	9453
2021	2	2022-05-01	ADA 17.5	245.66	6.74	51	15.66	77.65	9789
2021	2	2022-05-01	ADA 17.6	210.34	5.44	51	13.22	79.21	8664
2021	2	2022-05-01	ADA 17.7	227.43	5.9	48	15.34	78.32	8556
2021	2	2022-05-01	ADA 17.8	211.77	5.07	51	19.88	72.13	7345
2021	2	2022-05-01	SYM-305	213.45	3.45	48	22.45	71.24	5714
2021	2	2022-05-01	SYM-306	202.45	2.33	48	18.32	76.55	3612
2021	2	2022-05-01	SYM-307	246.55	6.77	51	11.21	79.23	10543
2021	2	2022-05-01	P.31G98	223.45	7.66	48	12.34	79.43	9045
2021	2	2022-05-01	DKC6590	234.55	8	48	14.09	79.43	12130
2021	3	2022-05-01	ADA 17.1	231.76	4.67	48	13.22	77.09	9554
2021	3	2022-05-01	ADA 17.2	236.55	6.87	45	14.09	77.68	10320
2021	3	2022-05-01	ADA 17.3	220.99	5.07	43	10.98	79.02	7654
2021	3	2022-05-01	ADA 17.4	265.65	6.45	51	8.12	82.45	11233
2021	3	2022-05-01	ADA 17.5	251.33	4.99	52	17.45	81.12	10456
2021	3	2022-05-01	ADA 17.6	217.66	3.99	52	15.44	81.22	7231
2021	3	2022-05-01	ADA 17.7	209.88	6.23	49	17.34	74.21	7432
2021	3	2022-05-01	ADA 17.8	216.52	6.23	50	20.09	73.34	8454
2021	3	2022-05-01	SYM-305	210.91	5.44	49	24.21	73.44	6004
2021	3	2022-05-01	SYM-306	196.13	3.45	45	16.21	75.21	4912
2021	3	2022-05-01	SYM-307	254.45	8.09	54	12.03	81.12	12932
2021	3	2022-05-01	P.31G98	229.88	7.67	51	14.33	80.34	10400
2021	3	2022-05-01	DKC6590	231.22	7.66	52	13.44	81	9432
2021	1	1 agust	ADA 17.1	224.57	6.21	48	8.12	78.12	9254
2021	1	1 agust	ADA 17.2	235.68	11.23	51	9.12	80.23	9543
2021	1	1 agust	ADA 17.3	251.22	5.45	49	7.65	80.32	11000
2021	1	1 agust	ADA 17.4	268.45	11.12	51	7.54	86.34	13123.2
2021	1	1 agust	ADA 17.5	252.33	7.66	52	11.22	82.33	10905
2021	1	1 agust	ADA 17.6	225.56	7.88	54	11.22	81.21	10545
2021	1	1 agust	ADA 17.7	235.45	7.55	52	10.08	84.32	9113
2021	1	1 agust	ADA 17.8	224.33	8.77	51	14.33	76.12	8024
2021	1	1 agust	SYM-305	215.56	5.09	47	16.34	77.66	7231.2
2021	1	1 agust	SYM-306	221.34	5.77	48	14.34	77.34	5254
2021	1	1 agust	SYM-307	258.99	8.56	53	6.77	85.23	12615
2021	1	1 agust	P.31G98	255.56	7.83	52	10.98	85.66	11212
2021	1	1 agust	DKC6590	251	7.67	54	7.76	87.66	12113
2021	2	1 agust	ADA 17.1	241.34	7.45	49	7.45	79.23	10450
2021	2	1 agust	ADA 17.2	241.22	10.12	52	10.56	81.34	12113
2021	2	1 agust	ADA 17.3	243.78	6.57	51	8.78	81.22	12134
2021	2	1 agust	ADA 17.4	275.54	10.39	53	6.32	84.21	12132
2021	2	1 agust	ADA 17.5	261.34	8.44	53	12.45	83.44	12115
2021	2	1 agust	ADA 17.6	231.89	8.22	52	10.45	83.44	11235
2021	2	1 agust	ADA 17.7	231.34	8.13	49	11.22	83.22	8234
2021	2	1 agust	ADA 17.8	228.76	9.87	53	15.45	78.43	8776
2021	2	1 agust	SYM-305	220.99	6.07	48	15	74.33	6321
2021	2	1 agust	SYM-306	225.66	4.34	50	16.23	75.34	7342
2021	2	1 agust	SYM-307	267.71	9.43	54	7.23	86.32	13215
2021	2	1 agust	P.31G98	257.66	8.77	51	9.87	87.32	12234
2021	2	1 agust	DKC6590	245.89	8.77	53	8.78	89	11233
2021	3	1 agust	ADA 17.1	246.78	8.77	50	9.12	81.22	11235
2021	3	1 agust	ADA 17.2	247.66	9.21	53	8.77	82.34	10912
2021	3	1 agust	ADA 17.3	255.66	5	50	9.34	79.32	10706
2021	3	1 agust	ADA 17.4	253.24	13.08	51	8.11	87.34	14232
2021	3	1 agust	ADA 17.5	271.34	9.13	55	13	85.12	10046
2021	3	1 agust	ADA 17.6	236.98	6.77	55	12.76	84.03	10234
2021	3	1 agust	ADA 17.7	240.32	9	51	9.34	85.23	7906
2021	3	1 agust	ADA 17.8	234.56	8.08	54	13.22	75.03	9234
2021	3	1 agust	SYM-305	225.67	7.65	51	14.21	79.32	9000
2021	3	1 agust	SYM-306	231.89	5.17	47	13.46	76	6453
2021	3	1 agust	SYM-307	254.33	10.05	56	8.34	87.34	12964
2021	3	1 agust	P.31G98	261.89	8.99	49	8.32	88.15	10565
2021	3	1 agust	DKC6590	256.78	6.99	51	10.91	88.13	13000
